# Supplementary material for: A Novel SVM Network Using HOG Feature for Prohibition Traffic Sign Recognition
Source: Hindawi journal article supplement (doi:10.1155/2022/6942940), 2022-01-01
Supplement: f1 [file 6942940.f1.docx]

# Supplemental materials

# for

# A novel SVM network using HOG feature for prohibition traffic sign recognition

*Yang Liu1,#, Wei Zhong2,#*

*1 College of information science and engineering, Chongqing Jiaotong University, Chongqing, 40074, China.
2 Department of Logistics Command, Army Logistics University of PLA, Chongqing, 40041, China.*

*Correspondence should be addressed to Wei Zhong; 44526081@qq.com.*

*#These two authors contributed equally to this work.*

# Contents

**Figure S1**. Illustration of 36 standard prohibition traffic sign pictures.


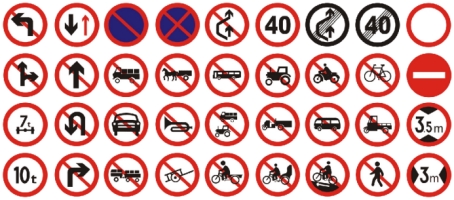


Figure S: Schematic diagram of prohibition traffic signs

**Figure S2**. Illustration of 15 different prohibition traffic sign samples in our data sets.


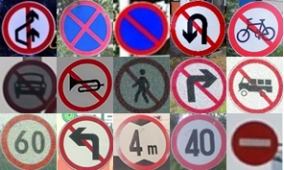


Figure S: Samples of verification data

**Table S1**. Exlaining the correspondence relations between different numbers and HOG-based methods in Figure 13 (1).

Table S1: Corresponding table of Number and Method in Figure 14 (1)

| Number | Method | Number | Method | Number | Method |
| --- | --- | --- | --- | --- | --- |
| 1 | cnn_hog3 | 24 | hog02s4c4w1 | 47 | Random trees HOG3 |
| 2 | cnn_cnn_hog3 | 25 | HOG02s16c4w1 | 48 | HOG+textures+ANN |
| 3 | cnn_cnn_hog3_haar | 26 | HOG02s4c2w1 | 49 | HOGs+LDA |
| 4 | CNN(IMG)_MLP(HOG3) | 27 | linearSVM_ECOC_HOG02 | 50 | CVOG+HOG(set1)+ANN |
| 5 | CNN(IMG)_MLP(HOG3)_MLP(HAAR) | 28 | HOG2 | 51 | RandomForest_Hog_20tree |
| 6 | IKSVM + PHOG + HOG2 | 29 | 2L NL SFA(HOG2) CCC | 52 | HOG(set 1) + ANN |
| 7 | SRC + LDAs I/HOG1/HOG2 | 30 | SFA(SFA(IM)+HOG) | 53 | KdTree + HOG 3456 kNN 5 |
| 8 | CS+HOGs+limited | 31 | 2L NL SFA(IM+HOG02)+CC | 54 | RandomForest-Hog |
| 9 | HOG+LDA+VQ | 32 | RandomForest_hog_hue_200tree | 55 | HOG_SVM |
| 10 | Combined HOG+VQ+LDA | 33 | HOG features (Set 3) + LDA | 56 | HOG 1 + 3-NN (Euclidean) |
| 11 | CS+HOGs | 34 | CVOG+HOG+texture+ANN | 57 | HOG 3 + 3-NN (Euclidean) |
| 12 | HOG2 + VQ + Variant of LDA | 35 | HOG3 normalization + LDA | 58 | HOG 3 + 1-NN (Euclidean) |
| 13 | HOGNoScaleLDA | 36 | HOG features (Set 1) + LDA | 59 | HOG 1 + 1-NN (Euclidean) |
| 14 | HOG+LDA | 37 | HOG1 features + LDA | 60 | HOG 2 + 1-NN (Euclidean) |
| 15 | 2L NL SFA(HOG02)+RG+GC | 38 | RandomForest_Hog_Hue_100tree | 61 | HOG 2 + 3-NN (Euclidean) |
| 16 | HOG0203 + LDA | 39 | RandomForest_HOG_100tree | 62 | KdTree HOG Set3 2 |
| 17 | HOG + Data Clustering | 40 | linearSVM_Allpairs_HOG123 | 63 | KdTree HOG Set1 |
| 18 | HOG2 + matlab LDA | 41 | KdTree HOG9720 kNN5 iter 1000 | 64 | KdTree HOG 2 2 |
| 19 | HOG features (Set 2) + LDA | 42 | linearSVM_Allpairs_HOG02 | 65 | HOGNEW2 |
| 20 | HOG2 nomralize with LDA | 43 | linearSVM_Allpairs_HOG02_2 | 66 | HOGNEW |
| 21 | HOG_02-L2RL2SVM | 44 | KdTree + HOG 9720 kNN 5 | 67 | HOG1 LDA modified |
| 22 | HOG_02_CramerAndSinger | 45 | KdTree + HOG 9720 |  |  |
| 23 | HOG + Diaglinear Analysis | 46 | KdTree + HOG 2520 |  |  |

**Table S2**. Explaining the correspondence relations between different numbers and SVM-based methods in Figure 13 (2).

Table S2: Corresponding table of Number and Method in Figure 14 (2)

| Number | Method | Number | Method | Number | Method |
| --- | --- | --- | --- | --- | --- |
| 1 | IKSVM + PHOG + HOG2 | 11 | HOG_02-L2RL2SVM | 21 | linearSVM_Allpairs_HOG02 |
| 2 | LDA+4SVM | 12 | libsvm --s | 22 | linearSVM_Allpairs_HOG02_2 |
| 3 | 2LDA+3SVM | 13 | linear SVM param selection | 23 | linear svm --s param selection |
| 4 | 2LDA+6SVM, various features | 14 | linearSVM_ECOC_HOG02 | 24 | Contrast-Gaussian SVM |
| 5 | 2LDA+5SVM | 15 | linear SVM fixed | 25 | HOG_SVM |
| 6 | 2LDA+2SVM | 16 | linear SVM fixed 2 | 26 | Gaussian SVM param selection |
| 7 | 2LDA+4SVM - various features | 17 | zeroLinearSVM | 27 | Multiclass SVM with CV preproc |
| 8 | LDA+2SVM | 18 | reduced2 svm | 28 | linear SVM |
| 9 | 2LDA+2SVM (2) | 19 | linearSVM_Allpairs_HOG123 |  |  |
| 10 | linearSVM_ECOC_ensemble | 20 | linearSVM_Allpairs_ensemble |  |  |

**Table S3.** Explaining the correspondence relations between different numbers and SVM&HOG-based methods in Figure 13 (3).

Table S3: Corresponding table of Number and Method in Figure 14 (3)

| Number | Method |
| --- | --- |
| 1 | IKSVM + PHOG + HOG2 |
| 2 | HOG_02-L2RL2SVM |
| 3 | linearSVM_ECOC_HOG02 |
| 4 | linearSVM_Allpairs_HOG123 |
| 5 | linearSVM_Allpairs_HOG02 |
| 6 | linearSVM_Allpairs_HOG02_2 |
| 7 | HOG_SVM |
